# Supplementary material for: Development and validation of a neural network-based survival model for mortality prediction in ischemic heart disease
Source: Research Square preprint supplement (doi:10.21203/rs.3.rs-4453681/v1), 2024-06-13
Supplement: Supplementary file 1 [file a66f4d523e4f080f1c77567f.xlsx]

## Sheet: list-of-features
feature_category	feature_name	value	included_in_reduced_model
ClinicalOne	age	z-score	1
ClinicalOne	pulse	z-score	1
ClinicalOne	sysbp	z-score	1
ClinicalOne	crea	z-score	1
ClinicalOne	arrest	true/false	0
ClinicalOne	stemi	true/false	1
ClinicalOne	enzymes	true/false/nan	0
ClinicalOne	killip	1.0/2.0/3.0/4.0/nan	1
ClinicalTwo	abnormal-ekg	missing/no/yes	0
ClinicalTwo	abnormal-qrs-st	missing/no/yes	0
ClinicalTwo	ccs	0.0/1.0/2.0/3.0/4.0/nan	1
ClinicalTwo	dia-bp	z-score	1
ClinicalTwo	dominance	b/l/r/nan	0
ClinicalTwo	familiary-ihd	missing/no/yes	1
ClinicalTwo	height	NA	1
ClinicalTwo	icd-or-pm	NA	1
ClinicalTwo	ischemia-test	inconclusive/missing/negative/positive	0
ClinicalTwo	lvef	(10,20]/(20,30]/(30,40]/(40,50]/(50,60]/[0,10]/missing	1
ClinicalTwo	nyha	1.0/2.0/3.0/4.0/nan	0
ClinicalTwo	sex	male/female	1
ClinicalTwo	smoking	ex/nan/no/yes	1
ClinicalTwo	vessels	1vd/2vd/3vd/dif/nan	1
ClinicalTwo	weight	z-score	1
Diagnoses	A04	true/false	1
Diagnoses	A08	true/false	1
Diagnoses	A09	true/false	1
Diagnoses	A41	true/false	1
Diagnoses	A49	true/false	1
Diagnoses	B02	true/false	1
Diagnoses	B34	true/false	1
Diagnoses	C18	true/false	1
Diagnoses	C34	true/false	1
Diagnoses	C43	true/false	1
Diagnoses	C44	true/false	1
Diagnoses	C50	true/false	1
Diagnoses	C67	true/false	1
Diagnoses	D10	true/false	1
Diagnoses	D12	true/false	1
Diagnoses	D14	true/false	1
Diagnoses	D17	true/false	1
Diagnoses	D23	true/false	1
Diagnoses	D25	true/false	1
Diagnoses	D30	true/false	1
Diagnoses	D50	true/false	1
Diagnoses	D64	true/false	1
Diagnoses	E03	true/false	1
Diagnoses	E04	true/false	1
Diagnoses	E05	true/false	1
Diagnoses	E10	true/false	1
Diagnoses	E11	true/false	1
Diagnoses	E13	true/false	1
Diagnoses	E14	true/false	1
Diagnoses	E16	true/false	1
Diagnoses	E66	true/false	1
Diagnoses	E78	true/false	1
Diagnoses	E87	true/false	1
Diagnoses	F10	true/false	1
Diagnoses	F17	true/false	1
Diagnoses	F32	true/false	1
Diagnoses	F33	true/false	1
Diagnoses	F41	true/false	1
Diagnoses	F43	true/false	1
Diagnoses	G40	true/false	1
Diagnoses	G43	true/false	1
Diagnoses	G44	true/false	1
Diagnoses	G45	true/false	1
Diagnoses	G47	true/false	1
Diagnoses	G51	true/false	1
Diagnoses	G56	true/false	1
Diagnoses	G57	true/false	1
Diagnoses	G62	true/false	1
Diagnoses	G96	true/false	1
Diagnoses	H02	true/false	1
Diagnoses	H10	true/false	1
Diagnoses	H11	true/false	1
Diagnoses	H16	true/false	1
Diagnoses	H25	true/false	1
Diagnoses	H26	true/false	1
Diagnoses	H33	true/false	1
Diagnoses	H34	true/false	1
Diagnoses	H35	true/false	1
Diagnoses	H36	true/false	1
Diagnoses	H40	true/false	1
Diagnoses	H43	true/false	1
Diagnoses	H50	true/false	1
Diagnoses	H52	true/false	1
Diagnoses	H53	true/false	1
Diagnoses	H57	true/false	1
Diagnoses	H60	true/false	1
Diagnoses	H61	true/false	1
Diagnoses	H65	true/false	1
Diagnoses	H66	true/false	1
Diagnoses	H80	true/false	1
Diagnoses	H81	true/false	1
Diagnoses	H83	true/false	1
Diagnoses	H90	true/false	1
Diagnoses	H91	true/false	1
Diagnoses	H93	true/false	1
Diagnoses	I11	true/false	1
Diagnoses	I15	true/false	1
Diagnoses	I20	true/false	1
Diagnoses	I21	true/false	1
Diagnoses	I24	true/false	1
Diagnoses	I25	true/false	1
Diagnoses	I26	true/false	1
Diagnoses	I30	true/false	1
Diagnoses	I34	true/false	1
Diagnoses	I35	true/false	1
Diagnoses	I42	true/false	1
Diagnoses	I44	true/false	1
Diagnoses	I45	true/false	1
Diagnoses	I46	true/false	1
Diagnoses	I47	true/false	1
Diagnoses	I48	true/false	1
Diagnoses	I49	true/false	1
Diagnoses	I50	true/false	1
Diagnoses	I51	true/false	1
Diagnoses	I63	true/false	1
Diagnoses	I65	true/false	1
Diagnoses	I69	true/false	1
Diagnoses	I70	true/false	1
Diagnoses	I71	true/false	1
Diagnoses	I73	true/false	1
Diagnoses	I74	true/false	1
Diagnoses	I80	true/false	1
Diagnoses	I82	true/false	1
Diagnoses	I83	true/false	1
Diagnoses	I95	true/false	1
Diagnoses	J03	true/false	1
Diagnoses	J15	true/false	1
Diagnoses	J18	true/false	1
Diagnoses	J20	true/false	1
Diagnoses	J30	true/false	1
Diagnoses	J32	true/false	1
Diagnoses	J33	true/false	1
Diagnoses	J34	true/false	1
Diagnoses	J35	true/false	1
Diagnoses	J37	true/false	1
Diagnoses	J38	true/false	1
Diagnoses	J44	true/false	1
Diagnoses	J45	true/false	1
Diagnoses	J84	true/false	1
Diagnoses	J96	true/false	1
Diagnoses	J98	true/false	1
Diagnoses	K04	true/false	1
Diagnoses	K05	true/false	1
Diagnoses	K08	true/false	1
Diagnoses	K11	true/false	1
Diagnoses	K13	true/false	1
Diagnoses	K21	true/false	1
Diagnoses	K22	true/false	1
Diagnoses	K25	true/false	1
Diagnoses	K26	true/false	1
Diagnoses	K27	true/false	1
Diagnoses	K29	true/false	1
Diagnoses	K40	true/false	1
Diagnoses	K42	true/false	1
Diagnoses	K43	true/false	1
Diagnoses	K44	true/false	1
Diagnoses	K51	true/false	1
Diagnoses	K52	true/false	1
Diagnoses	K56	true/false	1
Diagnoses	K57	true/false	1
Diagnoses	K58	true/false	1
Diagnoses	K59	true/false	1
Diagnoses	K60	true/false	1
Diagnoses	K61	true/false	1
Diagnoses	K62	true/false	1
Diagnoses	K65	true/false	1
Diagnoses	K70	true/false	1
Diagnoses	K76	true/false	1
Diagnoses	K80	true/false	1
Diagnoses	K81	true/false	1
Diagnoses	K85	true/false	1
Diagnoses	K86	true/false	1
Diagnoses	K92	true/false	1
Diagnoses	L02	true/false	1
Diagnoses	L03	true/false	1
Diagnoses	L08	true/false	1
Diagnoses	L30	true/false	1
Diagnoses	L40	true/false	1
Diagnoses	L50	true/false	1
Diagnoses	L90	true/false	1
Diagnoses	L98	true/false	1
Diagnoses	M02	true/false	1
Diagnoses	M05	true/false	1
Diagnoses	M06	true/false	1
Diagnoses	M10	true/false	1
Diagnoses	M13	true/false	1
Diagnoses	M15	true/false	1
Diagnoses	M16	true/false	1
Diagnoses	M17	true/false	1
Diagnoses	M18	true/false	1
Diagnoses	M19	true/false	1
Diagnoses	M20	true/false	1
Diagnoses	M21	true/false	1
Diagnoses	M22	true/false	1
Diagnoses	M23	true/false	1
Diagnoses	M24	true/false	1
Diagnoses	M25	true/false	1
Diagnoses	M31	true/false	1
Diagnoses	M35	true/false	1
Diagnoses	M43	true/false	1
Diagnoses	M47	true/false	1
Diagnoses	M48	true/false	1
Diagnoses	M50	true/false	1
Diagnoses	M51	true/false	1
Diagnoses	M53	true/false	1
Diagnoses	M54	true/false	1
Diagnoses	M62	true/false	1
Diagnoses	M65	true/false	1
Diagnoses	M67	true/false	1
Diagnoses	M70	true/false	1
Diagnoses	M71	true/false	1
Diagnoses	M72	true/false	1
Diagnoses	M75	true/false	1
Diagnoses	M76	true/false	1
Diagnoses	M77	true/false	1
Diagnoses	M79	true/false	1
Diagnoses	M80	true/false	1
Diagnoses	M81	true/false	1
Diagnoses	M85	true/false	1
Diagnoses	M99	true/false	1
Diagnoses	N13	true/false	1
Diagnoses	N17	true/false	1
Diagnoses	N18	true/false	1
Diagnoses	N20	true/false	1
Diagnoses	N21	true/false	1
Diagnoses	N30	true/false	1
Diagnoses	N31	true/false	1
Diagnoses	N35	true/false	1
Diagnoses	N39	true/false	1
Diagnoses	N43	true/false	1
Diagnoses	N45	true/false	1
Diagnoses	N48	true/false	1
Diagnoses	N50	true/false	1
Diagnoses	N60	true/false	1
Diagnoses	N81	true/false	1
Diagnoses	N83	true/false	1
Diagnoses	N84	true/false	1
Diagnoses	N92	true/false	1
Diagnoses	N95	true/false	1
Diagnoses	O04	true/false	1
Diagnoses	O80	true/false	1
Diagnoses	R00	true/false	1
Diagnoses	R04	true/false	1
Diagnoses	R06	true/false	1
Diagnoses	R07	true/false	1
Diagnoses	R09	true/false	1
Diagnoses	R10	true/false	1
Diagnoses	R19	true/false	1
Diagnoses	R29	true/false	1
Diagnoses	R39	true/false	1
Diagnoses	R49	true/false	1
Diagnoses	R50	true/false	1
Diagnoses	R52	true/false	1
Diagnoses	R56	true/false	1
Diagnoses	R59	true/false	1
Diagnoses	R60	true/false	1
Diagnoses	R63	true/false	1
Diagnoses	S00	true/false	1
Diagnoses	S01	true/false	1
Diagnoses	S02	true/false	1
Diagnoses	S05	true/false	1
Diagnoses	S06	true/false	1
Diagnoses	S09	true/false	1
Diagnoses	S10	true/false	1
Diagnoses	S13	true/false	1
Diagnoses	S20	true/false	1
Diagnoses	S22	true/false	1
Diagnoses	S30	true/false	1
Diagnoses	S32	true/false	1
Diagnoses	S40	true/false	1
Diagnoses	S42	true/false	1
Diagnoses	S43	true/false	1
Diagnoses	S46	true/false	1
Diagnoses	S50	true/false	1
Diagnoses	S51	true/false	1
Diagnoses	S52	true/false	1
Diagnoses	S60	true/false	1
Diagnoses	S61	true/false	1
Diagnoses	S62	true/false	1
Diagnoses	S63	true/false	1
Diagnoses	S66	true/false	1
Diagnoses	S70	true/false	1
Diagnoses	S71	true/false	1
Diagnoses	S72	true/false	1
Diagnoses	S80	true/false	1
Diagnoses	S81	true/false	1
Diagnoses	S82	true/false	1
Diagnoses	S83	true/false	1
Diagnoses	S86	true/false	1
Diagnoses	S90	true/false	1
Diagnoses	S91	true/false	1
Diagnoses	S92	true/false	1
Diagnoses	S93	true/false	1
Diagnoses	T00	true/false	1
Diagnoses	T14	true/false	1
Diagnoses	T15	true/false	1
Diagnoses	T18	true/false	1
Diagnoses	T26	true/false	1
Diagnoses	T39	true/false	1
Diagnoses	T63	true/false	1
Diagnoses	T65	true/false	1
Diagnoses	T78	true/false	1
Diagnoses	T81	true/false	1
Diagnoses	T83	true/false	1
Diagnoses	T84	true/false	1
Diagnoses	T88	true/false	1
Diagnoses	T92	true/false	1
Diagnoses	T93	true/false	1
Diagnoses	T98	true/false	1
Diagnoses	Z00	true/false	1
Diagnoses	Z01	true/false	1
Diagnoses	Z03	true/false	1
Diagnoses	Z04	true/false	1
Diagnoses	Z08	true/false	1
Diagnoses	Z09	true/false	1
Diagnoses	Z10	true/false	1
Diagnoses	Z13	true/false	1
Diagnoses	Z20	true/false	1
Diagnoses	Z30	true/false	1
Diagnoses	Z32	true/false	1
Diagnoses	Z34	true/false	1
Diagnoses	Z35	true/false	1
Diagnoses	Z36	true/false	1
Diagnoses	Z37	true/false	1
Diagnoses	Z39	true/false	1
Diagnoses	Z46	true/false	1
Diagnoses	Z47	true/false	1
Diagnoses	Z48	true/false	1
Diagnoses	Z50	true/false	1
Diagnoses	Z51	true/false	1
Diagnoses	Z53	true/false	1
Diagnoses	Z71	true/false	1
Diagnoses	Z72	true/false	1
Diagnoses	Z76	true/false	1
Diagnoses	Z85	true/false	1
Diagnoses	Z87	true/false	1
Diagnoses	Z88	true/false	1
Diagnoses	Z93	true/false	1
Diagnoses	Z94	true/false	1
Diagnoses	Z95	true/false	1
Diagnoses	Z96	true/false	1
Diagnoses	Z99	true/false	1
Biochemical	240	low/normal/high	0
Biochemical	DNK35131	low/normal/high	0
Biochemical	DNK35302	low/normal/high	0
Biochemical	DNK35842	low/normal/high	0
Biochemical	NPU01349	low/normal/high	1
Biochemical	NPU01370	low/normal/high	1
Biochemical	NPU01443	low/normal/high	1
Biochemical	NPU01459	low/normal/high	1
Biochemical	NPU01470	low/normal/high	1
Biochemical	NPU01472	low/normal/high	1
Biochemical	NPU01536	low/normal/high	1
Biochemical	NPU01566	low/normal/high	1
Biochemical	NPU01567	low/normal/high	1
Biochemical	NPU01568	low/normal/high	1
Biochemical	NPU01569	low/normal/high	1
Biochemical	NPU01682	low/normal/high	1
Biochemical	NPU01685	low/normal/high	1
Biochemical	NPU01700	low/normal/high	1
Biochemical	NPU01933	low/normal/high	1
Biochemical	NPU01944	low/normal/high	1
Biochemical	NPU01960	low/normal/high	1
Biochemical	NPU01961	low/normal/high	1
Biochemical	NPU02070	low/normal/high	1
Biochemical	NPU02192	low/normal/high	1
Biochemical	NPU02319	low/normal/high	1
Biochemical	NPU02320	low/normal/high	1
Biochemical	NPU02321	low/normal/high	1
Biochemical	NPU02410	low/normal/high	1
Biochemical	NPU02508	low/normal/high	1
Biochemical	NPU02593	low/normal/high	1
Biochemical	NPU02636	low/normal/high	1
Biochemical	NPU02647	low/normal/high	1
Biochemical	NPU02840	low/normal/high	1
Biochemical	NPU02902	low/normal/high	1
Biochemical	NPU03096	low/normal/high	1
Biochemical	NPU03230	low/normal/high	1
Biochemical	NPU03278	low/normal/high	1
Biochemical	NPU03429	low/normal/high	1
Biochemical	NPU03568	low/normal/high	1
Biochemical	NPU03577	low/normal/high	1
Biochemical	NPU03579	low/normal/high	1
Biochemical	NPU03607	low/normal/high	1
Biochemical	NPU03624	low/normal/high	1
Biochemical	NPU03688	low/normal/high	1
Biochemical	NPU03815	low/normal/high	1
Biochemical	NPU03943	low/normal/high	1
Biochemical	NPU03944	low/normal/high	1
Biochemical	NPU04094	low/normal/high	1
Biochemical	NPU04144	low/normal/high	1
Biochemical	NPU04998	low/normal/high	1
Biochemical	NPU08669	low/normal/high	1
Biochemical	NPU08694	low/normal/high	1
Biochemical	NPU08977	low/normal/high	1
Biochemical	NPU10267	low/normal/high	1
Biochemical	NPU10762	low/normal/high	1
Biochemical	NPU14267	low/normal/high	1
Biochemical	NPU18016	low/normal/high	1
Biochemical	NPU18878	low/normal/high	1
Biochemical	NPU19651	low/normal/high	1
Biochemical	NPU19652	low/normal/high	1
Biochemical	NPU19653	low/normal/high	1
Biochemical	NPU19654	low/normal/high	1
Biochemical	NPU19655	low/normal/high	1
Biochemical	NPU19656	low/normal/high	1
Biochemical	NPU19657	low/normal/high	1
Biochemical	NPU19658	low/normal/high	1
Biochemical	NPU19661	low/normal/high	1
Biochemical	NPU19673	low/normal/high	1
Biochemical	NPU19677	low/normal/high	1
Biochemical	NPU19748	low/normal/high	1
Biochemical	NPU19750	low/normal/high	1
Biochemical	NPU19763	low/normal/high	1
Biochemical	NPU19840	low/normal/high	1
Biochemical	NPU19924	low/normal/high	1
Biochemical	NPU22089	low/normal/high	1
Biochemical	NPU26631	low/normal/high	1
Biochemical	NPU27300	low/normal/high	1
Biochemical	NPU27412	low/normal/high	1
Biochemical	NPU27501	low/normal/high	1
Biochemical	NPU27547	low/normal/high	1
Biochemical	NPU27591	low/normal/high	1
Biochemical	NPU27783	low/normal/high	1
Biochemical	NPU28172	low/normal/high	1
Biochemical	NPU28289	low/normal/high	1
Biochemical	RHB00001	low/normal/high	0
Procedures	KABC26	true/false	0
Procedures	KABC56	true/false	0
Procedures	KACC51	true/false	0
Procedures	KCJB10	true/false	0
Procedures	KCJE20	true/false	0
Procedures	KCKC10	true/false	0
Procedures	KCKC15	true/false	0
Procedures	KCKD05	true/false	0
Procedures	KCKD65	true/false	0
Procedures	KDJD20	true/false	0
Procedures	KGAA10	true/false	0
Procedures	KJAB30	true/false	0
Procedures	KJEA00	true/false	0
Procedures	KJFA15	true/false	0
Procedures	KJKA21	true/false	0
Procedures	KKBV02	true/false	0
Procedures	KKCD32	true/false	0
Procedures	KKED22	true/false	0
Procedures	KKFD46	true/false	0
Procedures	KNBH51	true/false	0
Procedures	KNFB20	true/false	0
Procedures	KNFB30	true/false	0
Procedures	KNFB40	true/false	0
Procedures	KNGA11	true/false	0
Procedures	KNGB40	true/false	0
Procedures	KNGD11	true/false	0
Procedures	KNGF11	true/false	0
Procedures	KPDP30	true/false	0
Procedures	KPJD42	true/false	0
Procedures	KQAB00	true/false	0
Procedures	KQAE10	true/false	0
Procedures	KQBB10	true/false	0
Procedures	KQBE10	true/false	0
Procedures	KQCB00	true/false	0
Procedures	KQCB99	true/false	0
Procedures	KQDB10	true/false	0
Procedures	KQDB99	true/false	0
Procedures	KTAB00	true/false	0
Procedures	KTFC10	true/false	0
Procedures	KTHA10	true/false	0
Procedures	KTKE00	true/false	0
Procedures	KTNE20	true/false	0
Procedures	KTNE25	true/false	0
Procedures	KTPJ05	true/false	0
Procedures	KTQW99	true/false	0
Procedures	KTQX00	true/false	0
Procedures	KUDB02	true/false	0
Procedures	KUDB22	true/false	0
Procedures	KUDH02	true/false	0
Procedures	KUDQ12	true/false	0
Procedures	KUDQ30	true/false	0
Procedures	KUGC12	true/false	0
Procedures	KUGC15	true/false	0
Procedures	KUJD02	true/false	0
Procedures	KUJD05	true/false	0
Procedures	KUJF32	true/false	0
Procedures	KUJF35	true/false	0
Procedures	KUJF42	true/false	0
Procedures	KUJF45	true/false	0
Procedures	KUJG02	true/false	0
Procedures	KUJH02	true/false	0
Procedures	KUJK02	true/false	0
Procedures	KUKC02	true/false	0
Procedures	KUKC05	true/false	0
Procedures	UCGG00	true/false	0
Procedures	UCGG01	true/false	0
Procedures	UCHA3	true/false	0
Procedures	UCXA	true/false	0
Procedures	UCXF	true/false	0
Procedures	UWW10	true/false	0
Procedures	UWW20	true/false	0
Procedures	UWW30	true/false	0
Procedures	UXAC80	true/false	0
Procedures	UXAC85	true/false	0
Procedures	UXAG00	true/false	0
Procedures	UXCA00	true/false	0
Procedures	UXCA40	true/false	0
Procedures	UXCB00	true/false	0
Procedures	UXCC00	true/false	0
Procedures	UXCC70	true/false	0
Procedures	UXCC77	true/false	0
Procedures	UXCD00	true/false	0
Procedures	UXCD10	true/false	0
Procedures	UXCD15	true/false	0
Procedures	UXCD30	true/false	0
Procedures	UXCD60	true/false	0
Procedures	UXCD62	true/false	0
Procedures	UXCD75	true/false	0
Procedures	UXCE30	true/false	0
Procedures	UXMA00	true/false	0
Procedures	UXMD15	true/false	0
Procedures	UXME10	true/false	0
Procedures	UXME20	true/false	0
Procedures	UXME30	true/false	0
Procedures	UXMF10	true/false	0
Procedures	UXMG25	true/false	0
Procedures	UXRA45	true/false	0
Procedures	UXRC00	true/false	0
Procedures	UXRC20	true/false	0
Procedures	UXRC40	true/false	0
Procedures	UXRC45	true/false	0
Procedures	UXRC50	true/false	0
Procedures	UXRD00	true/false	0
Procedures	UXRD15	true/false	0
Procedures	UXRD25	true/false	0
Procedures	UXRD60	true/false	0
Procedures	UXRD65	true/false	0
Procedures	UXRE10	true/false	0
Procedures	UXRE20	true/false	0
Procedures	UXRE30	true/false	0
Procedures	UXRE80	true/false	0
Procedures	UXRF15	true/false	0
Procedures	UXRF20	true/false	0
Procedures	UXRF25	true/false	0
Procedures	UXRF30	true/false	0
Procedures	UXRF40	true/false	0
Procedures	UXRF45	true/false	0
Procedures	UXRF50	true/false	0
Procedures	UXRG10	true/false	0
Procedures	UXRG15	true/false	0
Procedures	UXRG20	true/false	0
Procedures	UXRG25	true/false	0
Procedures	UXRG27	true/false	0
Procedures	UXRG30	true/false	0
Procedures	UXRG40	true/false	0
Procedures	UXRG45	true/false	0
Procedures	UXRG47	true/false	0
Procedures	UXRG50	true/false	0
Procedures	UXRG80	true/false	0
Procedures	UXUA25	true/false	0
Procedures	UXUB00	true/false	0
Procedures	UXUB10	true/false	0
Procedures	UXUB30	true/false	0
Procedures	UXUC10	true/false	0
Procedures	UXUC15	true/false	0
Procedures	UXUC40	true/false	0
Procedures	UXUC80	true/false	0
Procedures	UXUC81	true/false	0
Procedures	UXUD10	true/false	0
Procedures	UXUD15	true/false	0
Procedures	UXUD20	true/false	0
Procedures	UXUD25	true/false	0
Procedures	UXUD61	true/false	0
Procedures	UXUD75	true/false	0
Procedures	UXUD80	true/false	0
Procedures	UXUD82	true/false	0
Procedures	UXUD92	true/false	0
Procedures	UXUD95	true/false	0
Procedures	UXUF00	true/false	0
Procedures	UXUF05	true/false	0
Procedures	UXUF15	true/false	0
Procedures	UXUG00	true/false	0
Procedures	UXUG05	true/false	0
Procedures	UXUG25	true/false	0
